# Supplementary material for: Temperature and Temperature Humidity Index Changes during Summer to Autumn in a Temperate Zone May Affect Liveweight Gain and Feed Efficiency in Sheep
Source: MDPI journal article supplement (doi:10.3390/ruminants2040027), 2022-10-01
Supplement: s1 [file s1]

**Table S1.** Lowest and highest ranges for maximum temperature (MaxT (°C)) in the animal house, minimum temperature (MinT (°C)), relative humidity at maximum temperature (RH@MaxT), relative humidity at minimum temperature (RH@MinT), maximum temperature humidity index (MaxTHI) and Maximum THI (MinTHI) during the 8-week feeding period.

| Parameters <sup>1</sup> | MaxT (°C) | MinT (°C) | RH@MaxT | RH@MinT | MaxTHI | MinTHI |
|-------------------------|-----------|-----------|---------|---------|--------|--------|
| Weeks 1-4               |           |           |         |         |        |        |
| Lowest                  | 16.3      | 6.6       | 26.7    | 70.8    | 60.5   | 45.5   |
| Highest                 | 36.6      | 17.5      | 69.2    | 100     | 84.0   | 63.3   |
| Average daily           | 24.5      | 12.2      | 46.2    | 89.5    | 70.6   | 54.2   |
| Weeks 5-8               |           |           |         |         |        |        |
| Lowest                  | 18.5      | 5.4       | 20.6    | 63.8    | 63.5   | 41.8   |
| Highest                 | 33.5      | 18.1      | 72.7    | 100     | 78.8   | 63.3   |
| Average daily           | 27.5      | 13.9      | 41.8    | 87.8    | 73.5   | 57.0   |

<sup>1</sup> Lowest = minimum figure recorded; highest = maximum figure recorded during the 8-week period for temperature and THI, while relative humidity was recorded at the minimum and maximum temperature points.

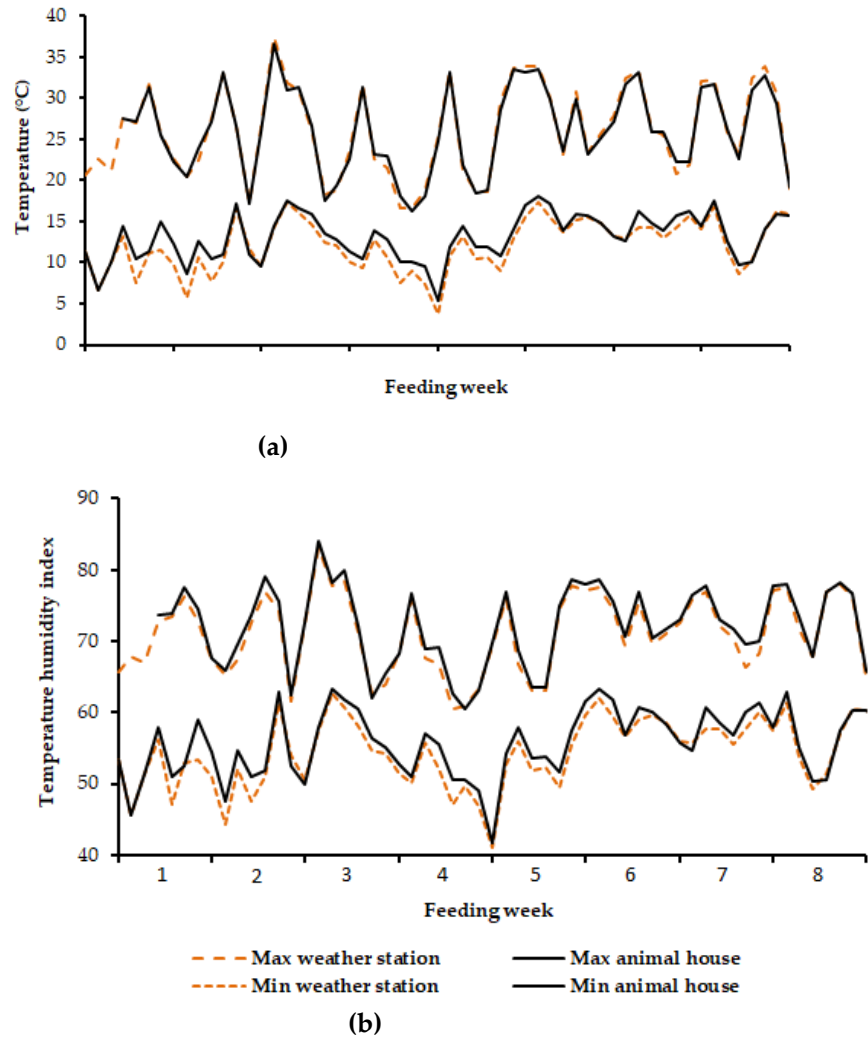

**Figure S1.** The Maximum (Max) and minimum (Min) daily temperature (a) and temperature humidity index (THI) (b), in the animal house (black solid line) and at the external weather station 200 m away from the animal house (orange dashed line) obtained during the experimental period in Hamilton, Victoria.
