# Supplementary material for: Temperature and Temperature Humidity Index Changes during Summer to Autumn in a Temperate Zone May Affect Liveweight Gain and Feed Efficiency in Sheep
Source: MDPI journal article supplement (doi:10.3390/ruminants2040027), 2022-10-01
Supplement: s1 [file s1]

Archive with 1 entries (1 files):
- ruminants-1884490-supplementary.pdf
